# Supplementary material for: Complexes of platinum(ii) containing ferrocenylethynyl ligands: synthesis, characterization and spectroscopic and electrochemical properties
Source: Royal Society of Chemistry journal article supplement (doi:10.1039/b806572a), 2008-01-01
Supplement: b806572a.pdf [file b806572a.pdf]

**Complexes of Platinum(II) containing Ferrocenylethynyl ligands:  
Synthesis, Characterization and Spectroscopic and Electrochemical  
Properties.**

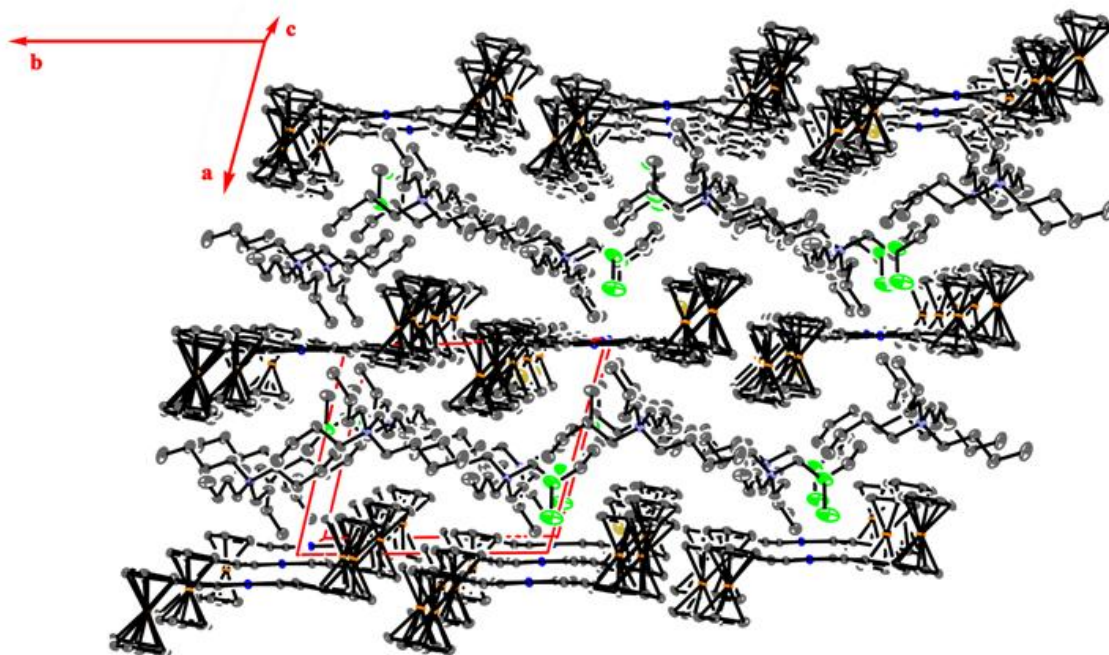

**Figure S1.** Stacking Pattern of complex  $6 \cdot 2\text{H}_2\text{O} \cdot 2\text{CH}_2\text{Cl}_2$

Some crystal data for (NBu<sub>4</sub>)[Pt(bzq)(C≡Cfc)<sub>2</sub>].0.5CHCl<sub>3</sub> **5·0.5CHCl<sub>3</sub>**

---

|                                 |                                                                                                  |                     |
|---------------------------------|--------------------------------------------------------------------------------------------------|---------------------|
| Empirical formula               | C <sub>107</sub> H <sub>120</sub> Cl <sub>3</sub> Fe <sub>4</sub> N <sub>4</sub> Pt <sub>2</sub> |                     |
| Formula weight                  | 2182.00                                                                                          |                     |
| Temperature                     | 173(1) K                                                                                         |                     |
| Wavelength                      | 0.71073 Å                                                                                        |                     |
| Crystal system                  | <i>P</i> 21/a                                                                                    |                     |
| Space group                     | Monoclinic                                                                                       |                     |
| Unit cell dimensions            | <i>a</i> = 15.787 Å                                                                              | <i>α</i> = 90°.     |
|                                 | <i>b</i> = 25.990 Å                                                                              | <i>β</i> = 105.34°. |
|                                 | <i>c</i> = 25.055 Å                                                                              | <i>γ</i> = 90°.     |
| Volume                          | 9913.8 Å <sup>3</sup>                                                                            |                     |
| <i>Z</i>                        | 4                                                                                                |                     |
| Density (calculated)            | 1.462 Mg/m <sup>3</sup>                                                                          |                     |
| Absorption coefficient          | 3.509 mm <sup>-1</sup>                                                                           |                     |
| F(000)                          | 4404                                                                                             |                     |
| Crystal size                    | 0.5 x 0.125 x 0.05 mm <sup>3</sup>                                                               |                     |
| Theta range for data collection | 4.09 to 25.35°.                                                                                  |                     |
| Index ranges                    | 0 ≤ <i>h</i> ≤ 19, 0 ≤ <i>k</i> ≤ 31, -30 ≤ <i>l</i> ≤ 29                                        |                     |
| Reflections collected           | 18048                                                                                            |                     |
| Independent reflections         | 18048 [R(int) = 0.0000]                                                                          |                     |

---

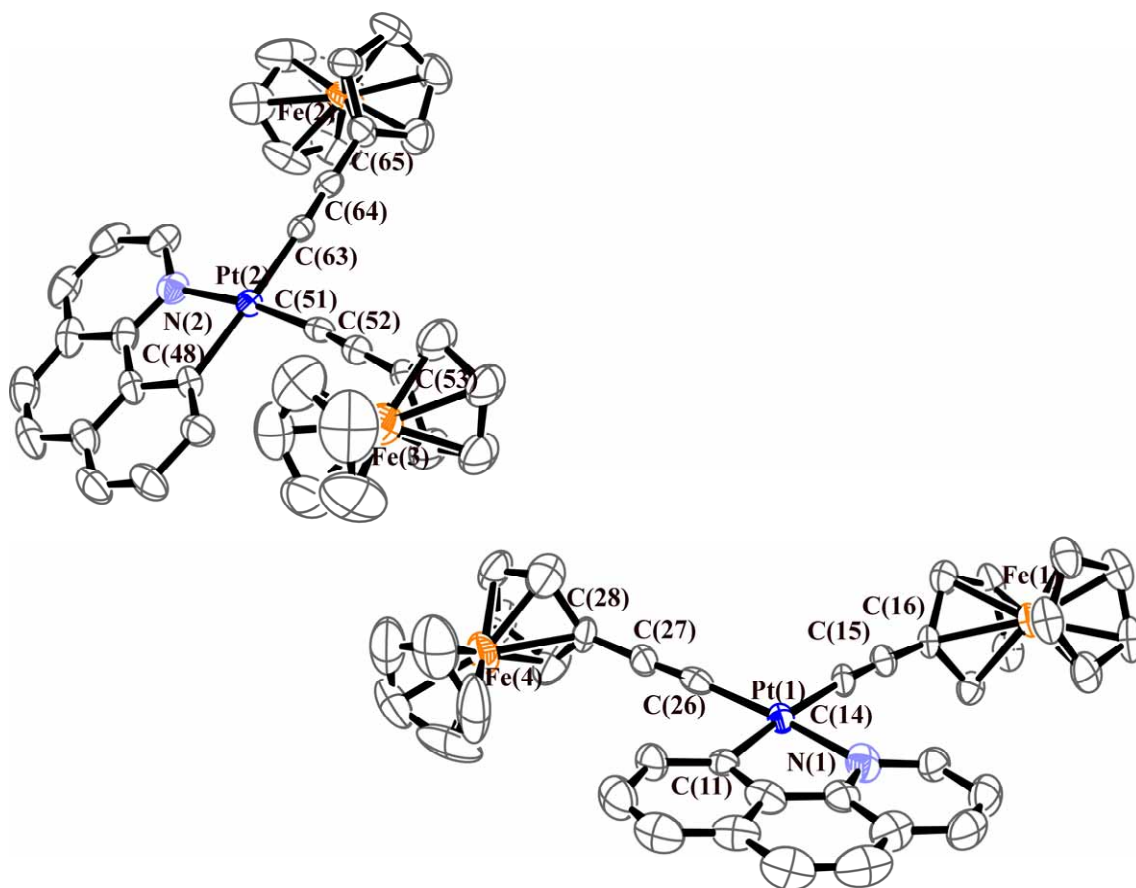

**Figure S2.** View of the anionic part in the asymmetric unit of the anion  $[\text{Pt}(\text{bzq})(\text{C}\equiv\text{CFc})_2]^-$  of complex **5**. Hydrogen atoms have been omitted for clarity. Full ellipsoids for all atoms are at their 50% probability level.

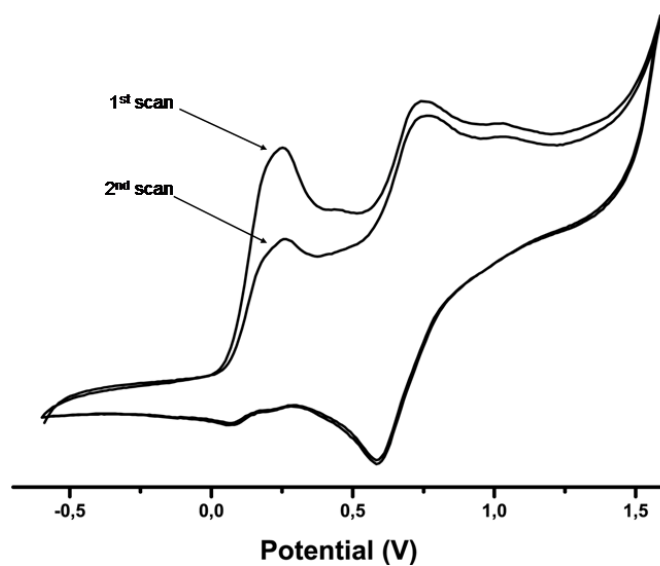

**Figure S3.** Cyclic voltammogram of complex **3** in  $\text{CH}_2\text{Cl}_2$  at 25 °C. Scan rate  $100 \text{ mV s}^{-1}$ ,  $\text{NBu}_4\text{PF}_6$  used as supporting electrolyte.

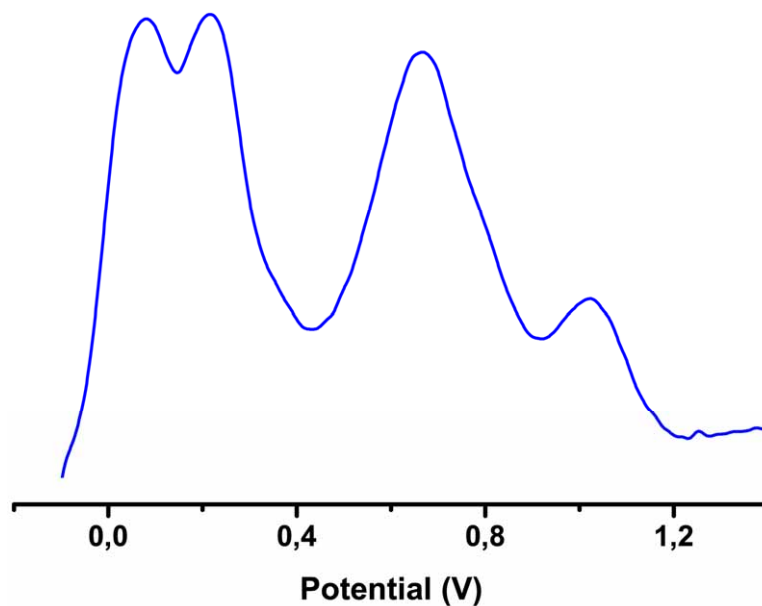

**Figure S4.** Differential pulse voltammogram of complex **4** in  $\text{CH}_2\text{Cl}_2$  at 25 °C. Scan rate =  $10 \text{ mV s}^{-1}$ , pulse amplitude = 10 mV, pulse width = 50 ms, pulse period = 20 ms.

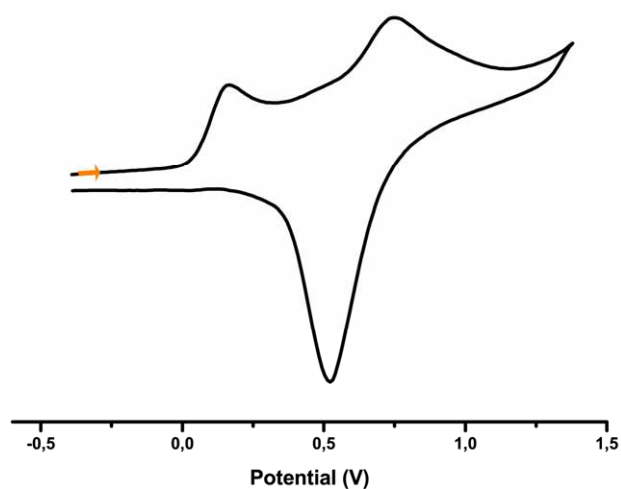

**Figure S5.** Cyclic voltammogram of complex **6** in  $\text{CH}_2\text{Cl}_2$  at  $25\text{ }^\circ\text{C}$ . Scan rate  $100\text{ mV s}^{-1}$ ,  $\text{NBu}_4\text{PF}_6$  used as supporting electrolyte.

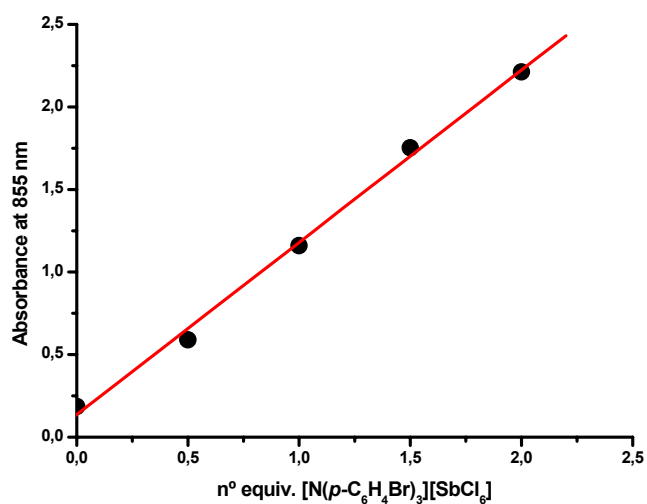

**Figure S6.** Beer plot of the absorbance at 855 nm of the oxidised complex **1** against the equiv of oxidant
